# Supplementary material
Source: PubMed Central journal article supplement (PMC6983951)

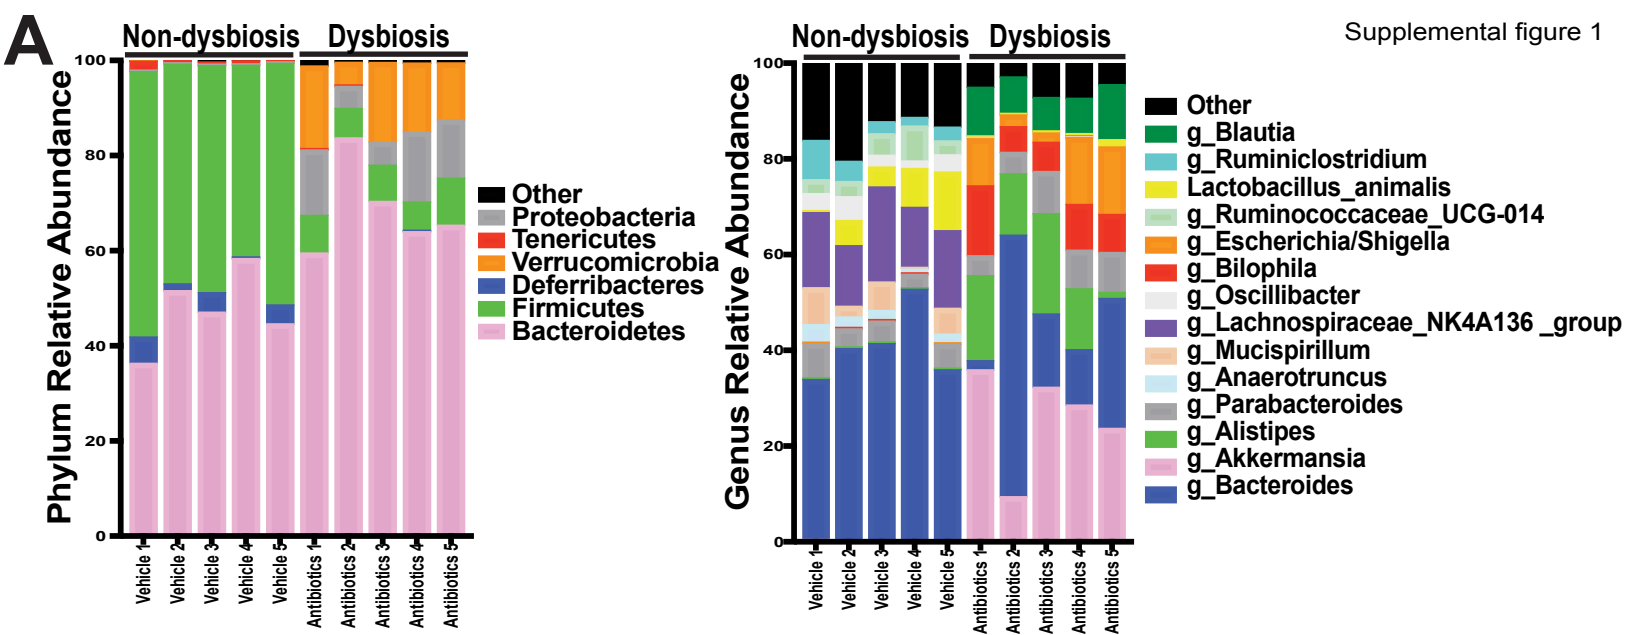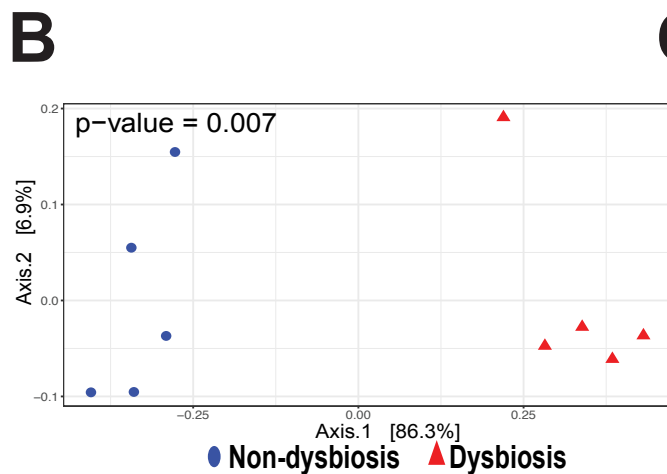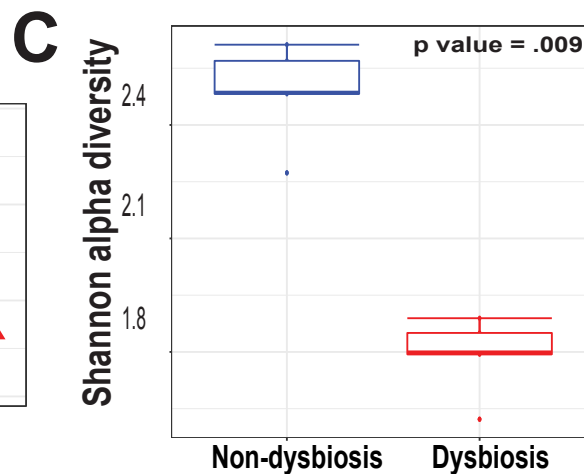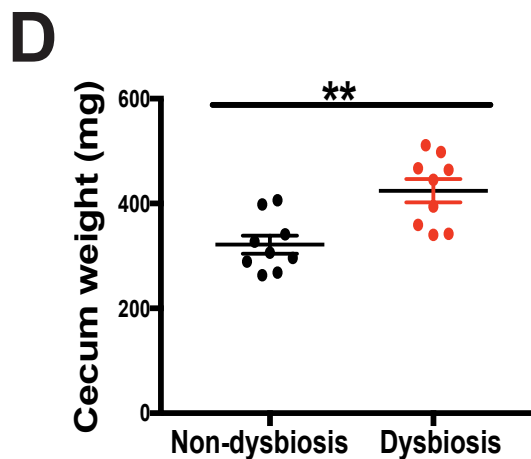

Supplement: NIHMS1529134-supplement-1.pdf [file NIHMS1529134-supplement-1.pdf]

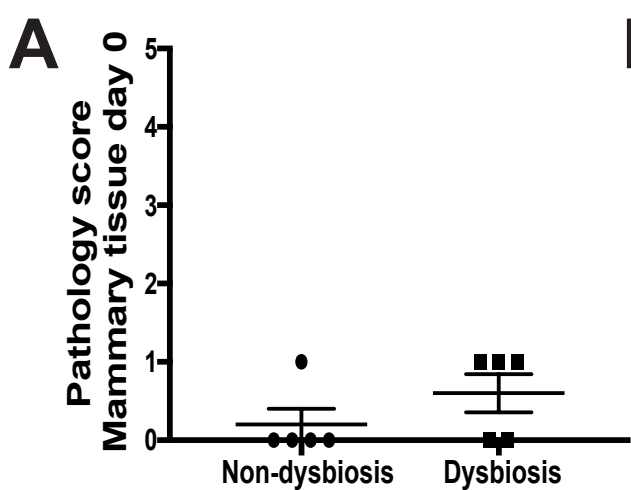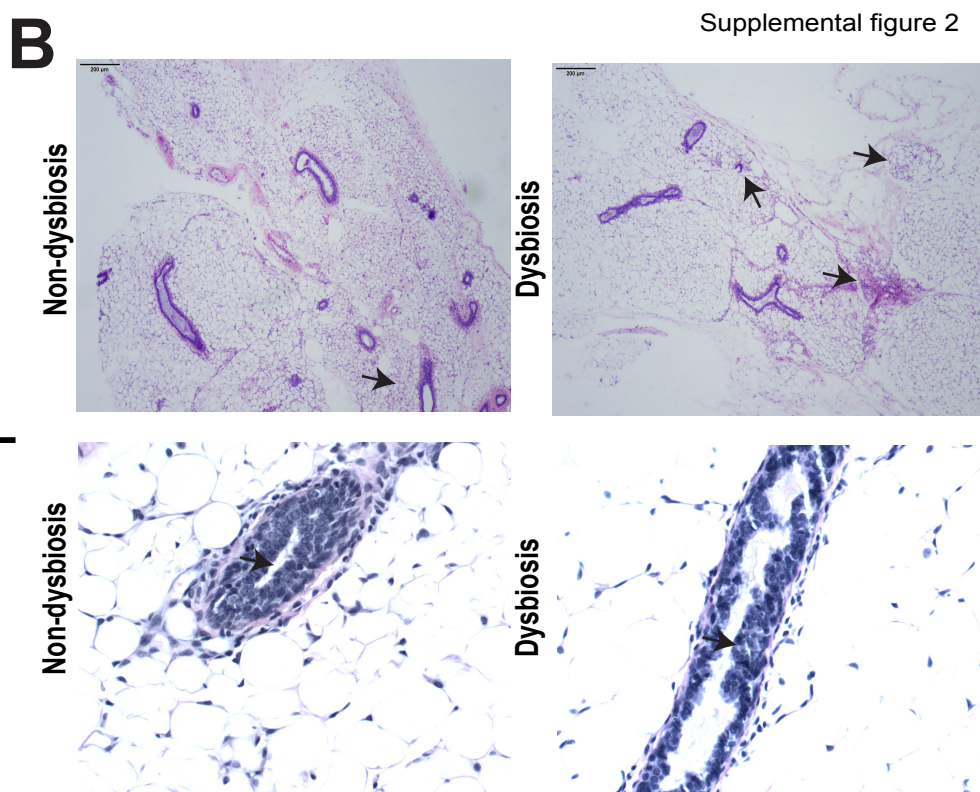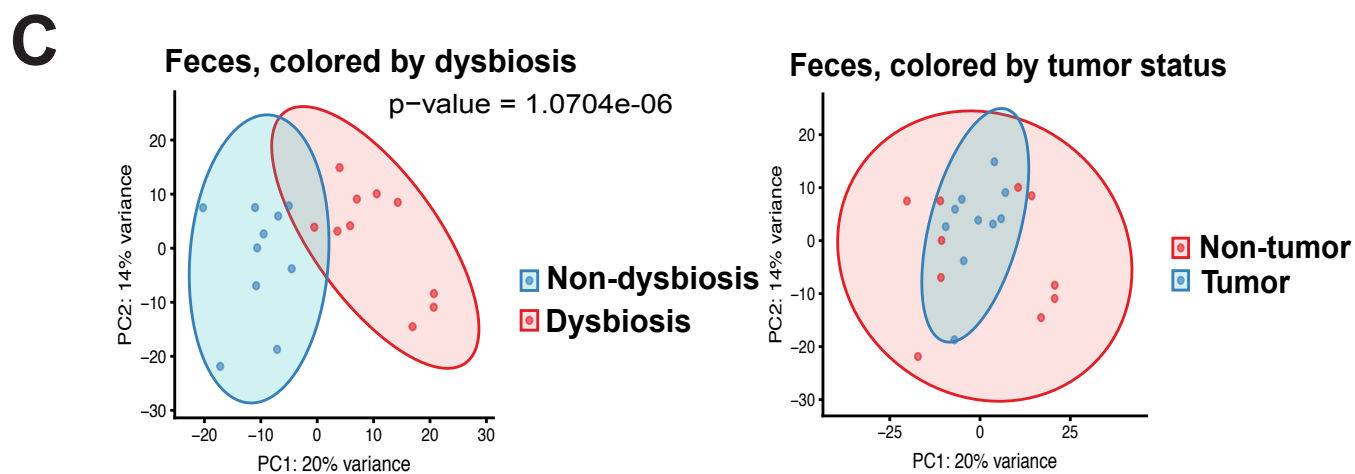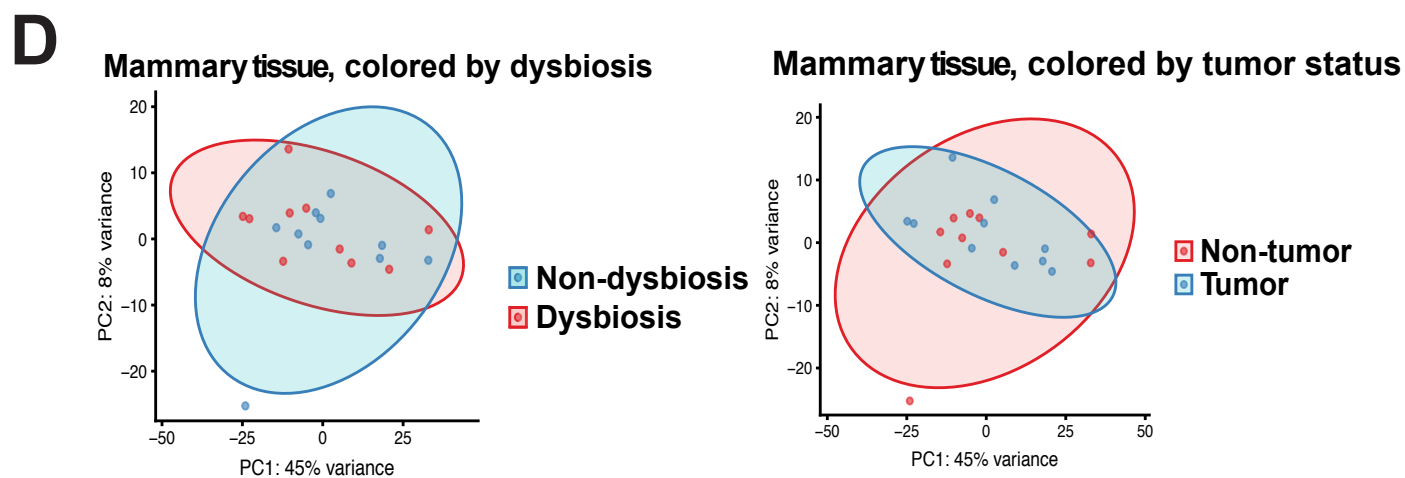

Supplement: NIHMS1529134-supplement-2.pdf [file NIHMS1529134-supplement-2.pdf]

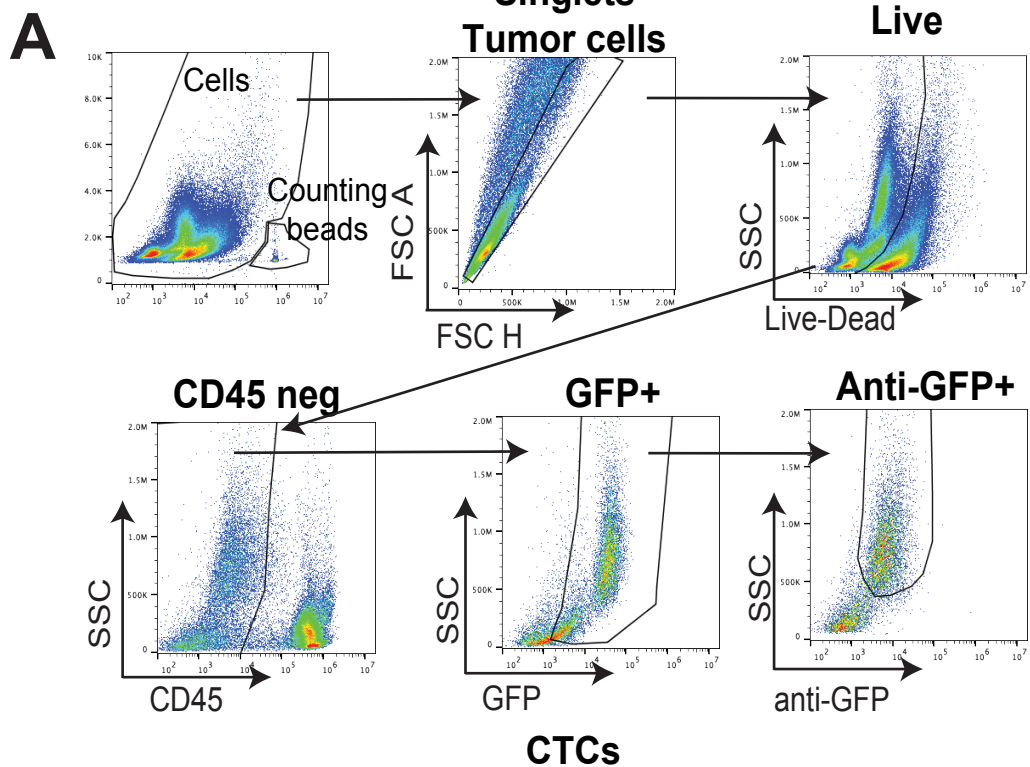

**CTCs**

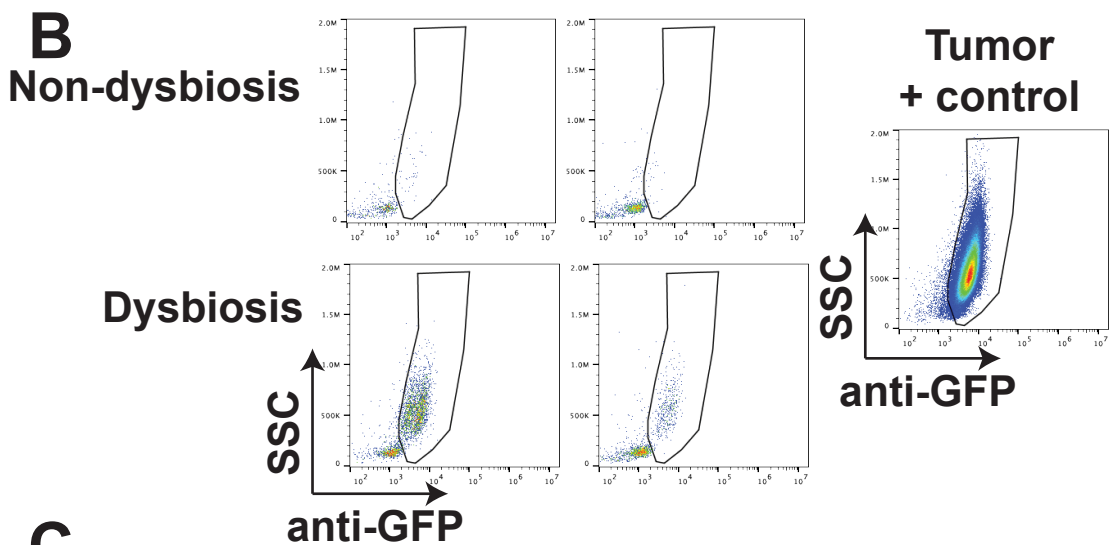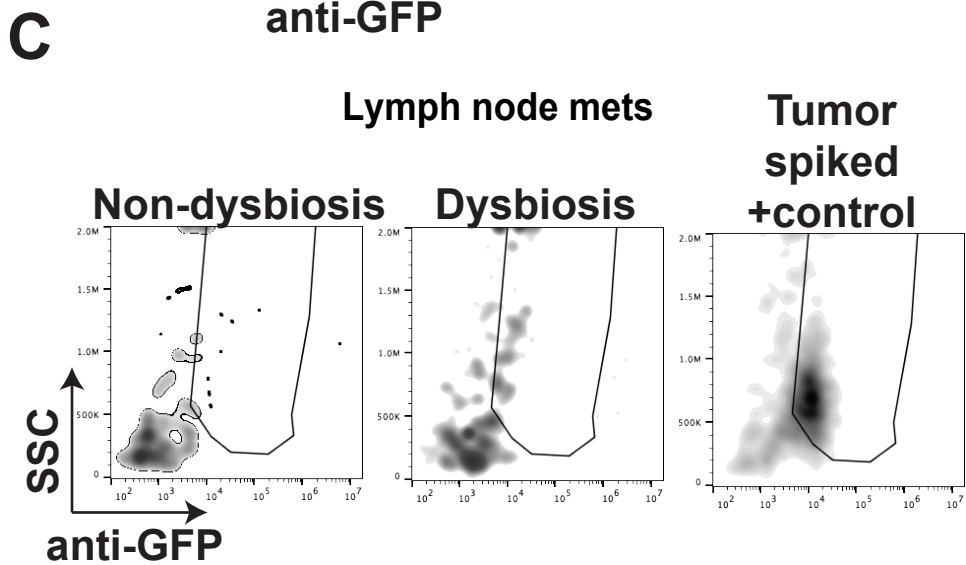

Supplement: NIHMS1529134-supplement-3.pdf [file NIHMS1529134-supplement-3.pdf]

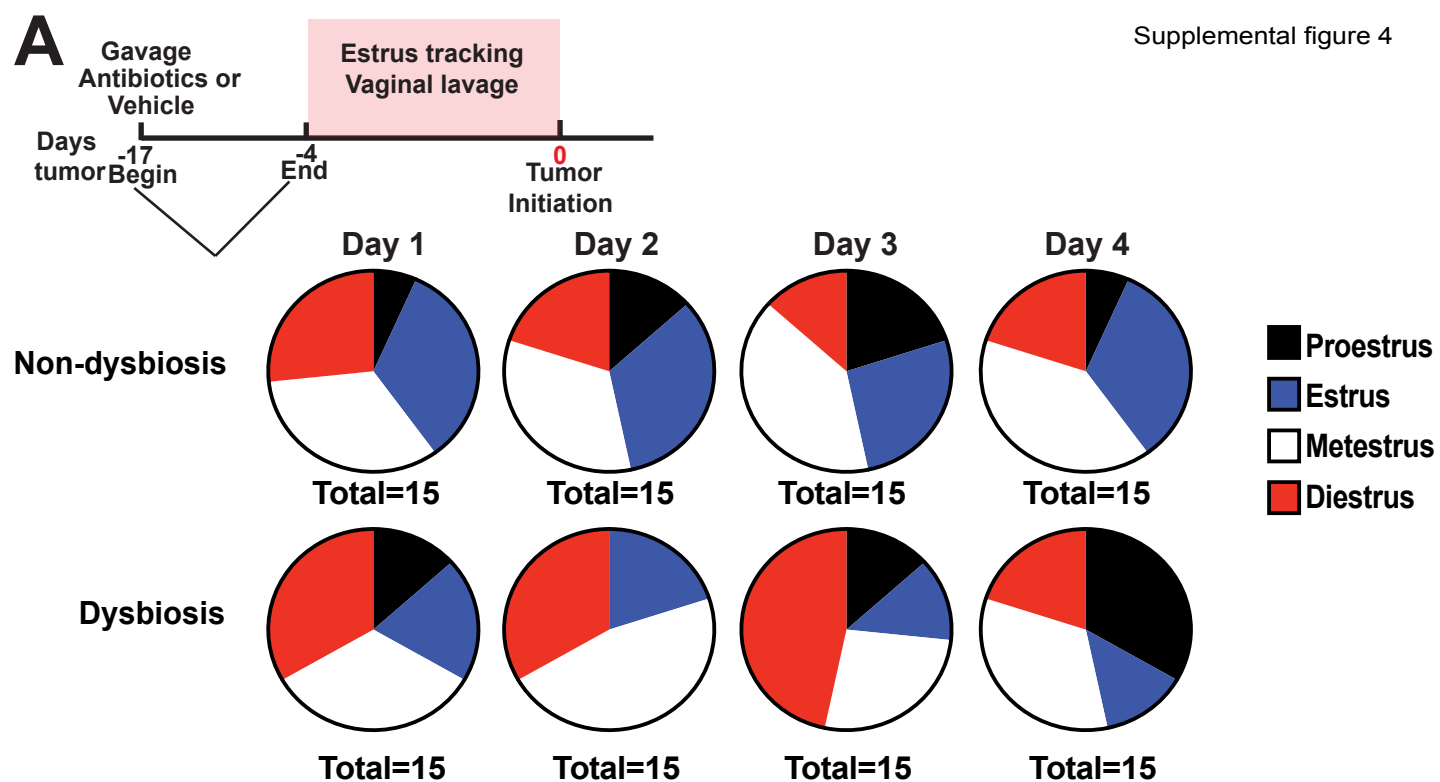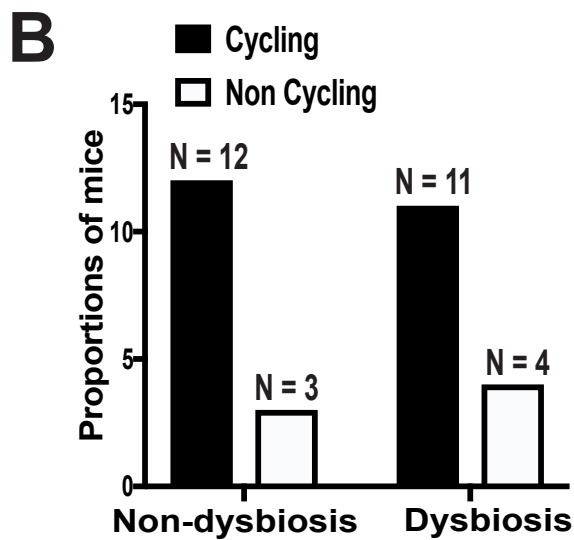

Supplement: NIHMS1529134-supplement-4.pdf [file NIHMS1529134-supplement-4.pdf]

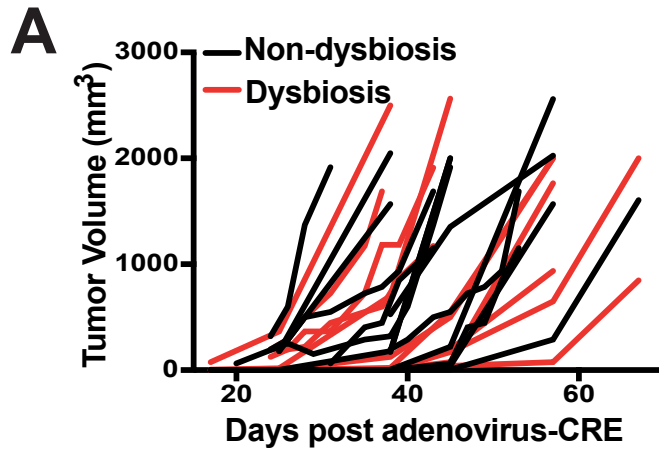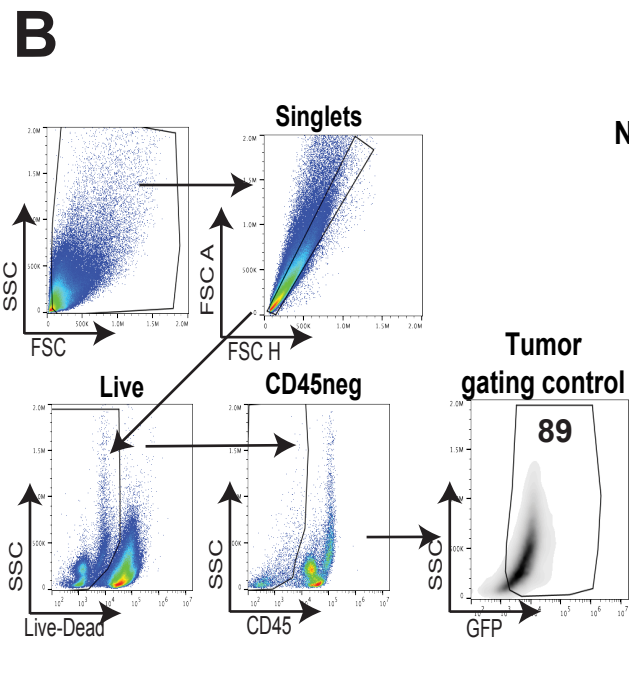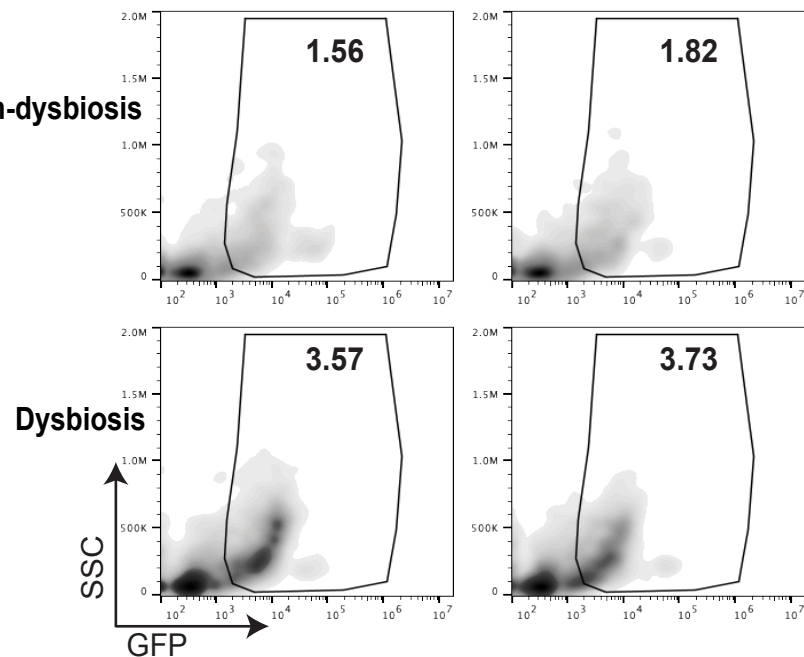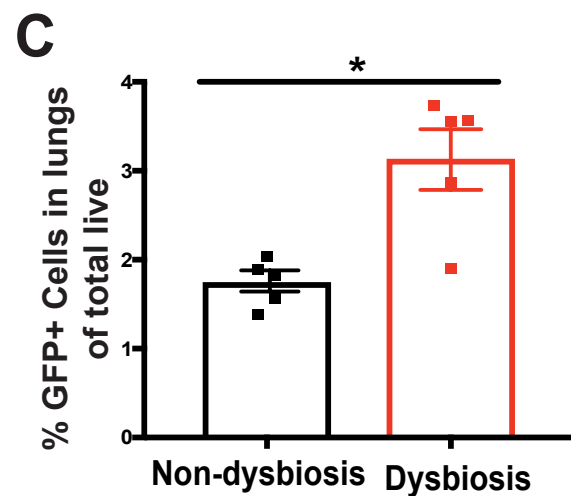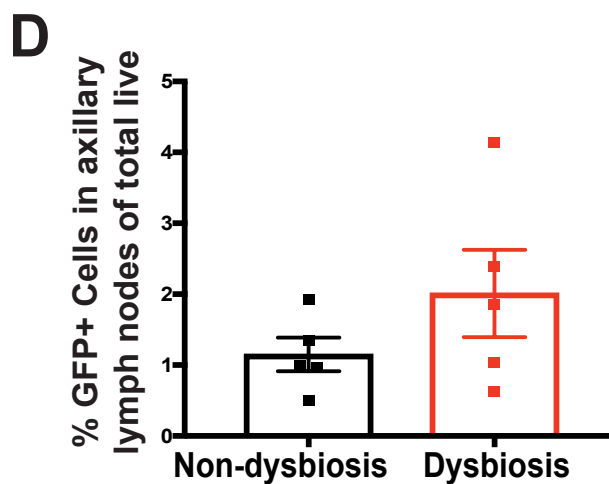

Supplement: NIHMS1529134-supplement-5.pdf [file NIHMS1529134-supplement-5.pdf]

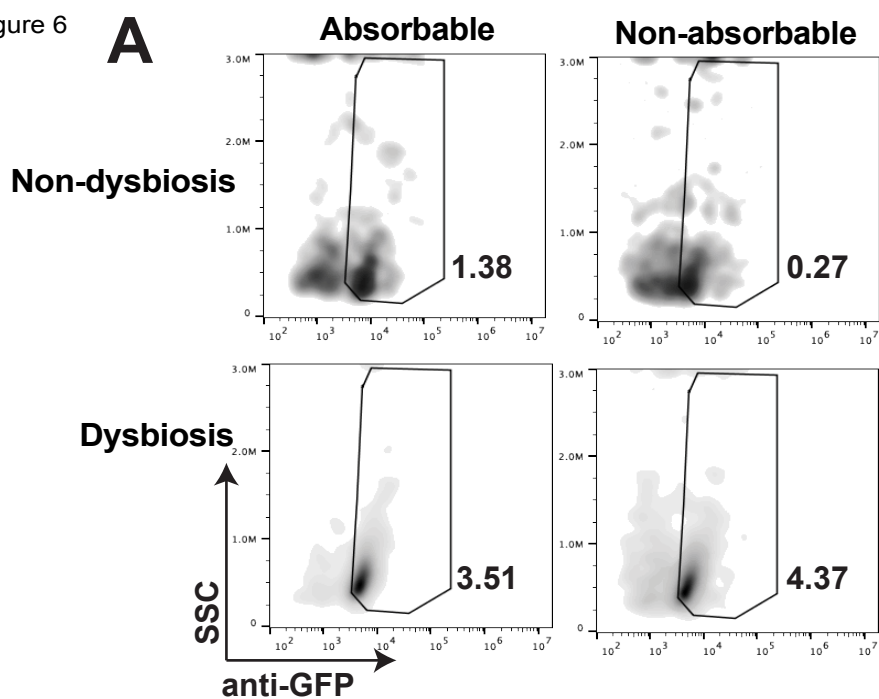**B**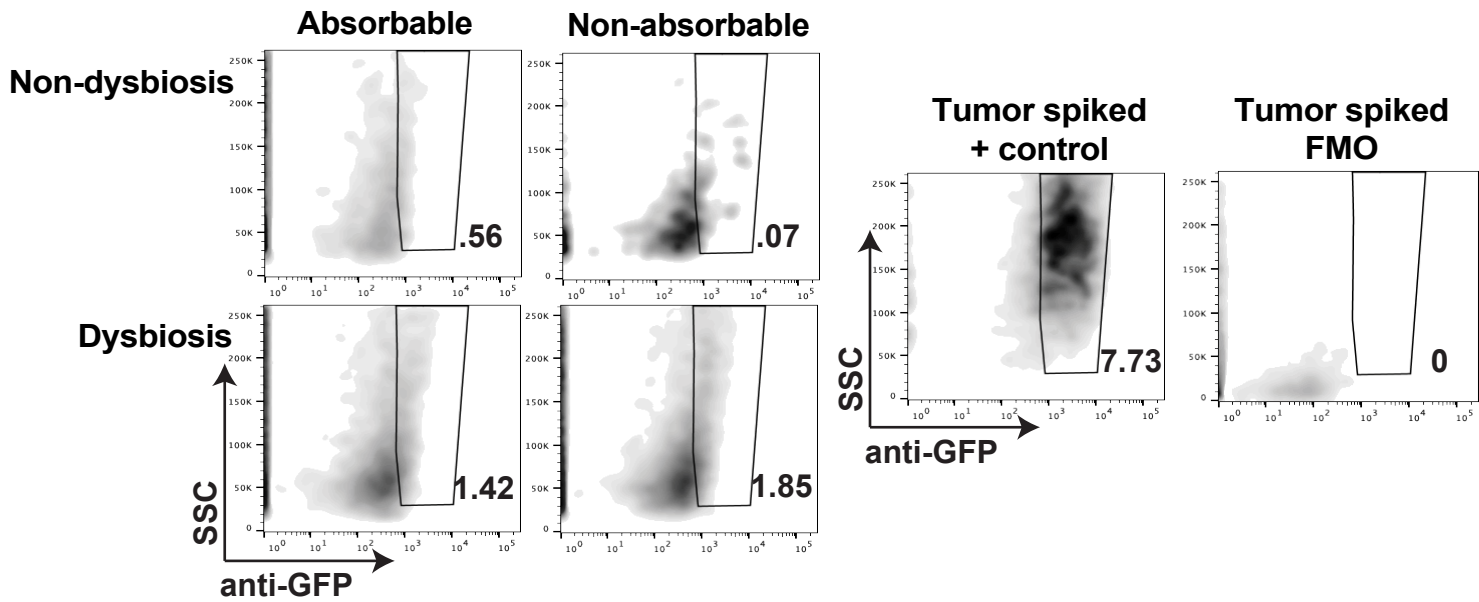

Supplement: NIHMS1529134-supplement-6.pdf [file NIHMS1529134-supplement-6.pdf]

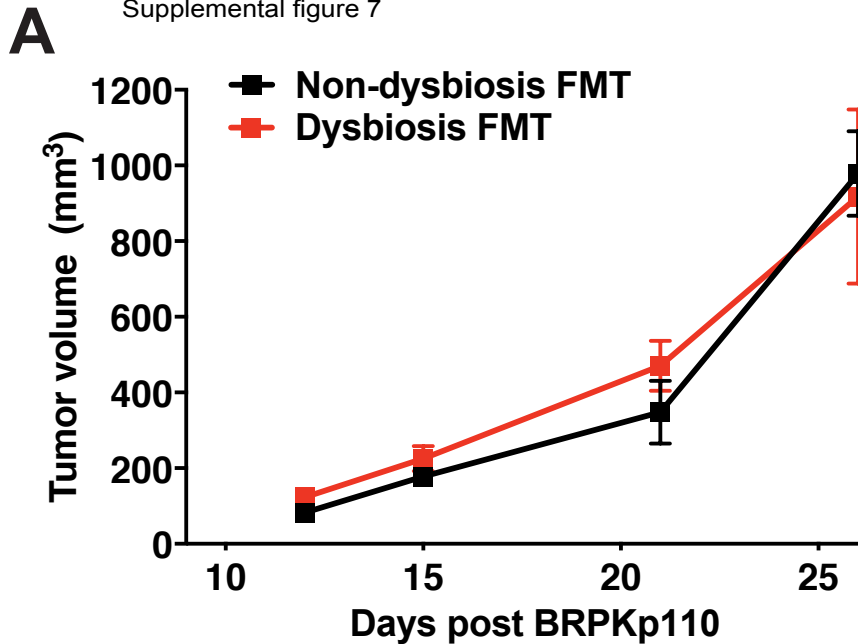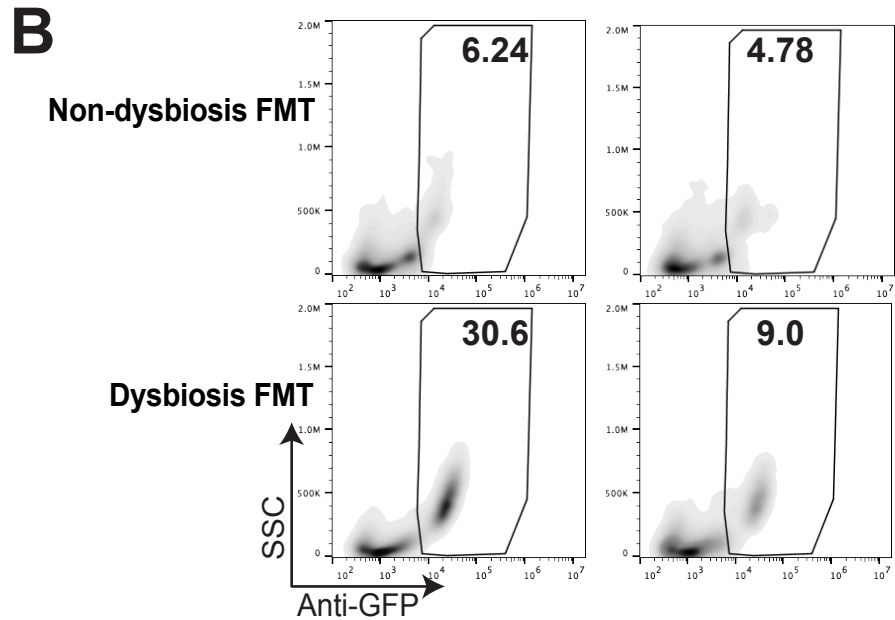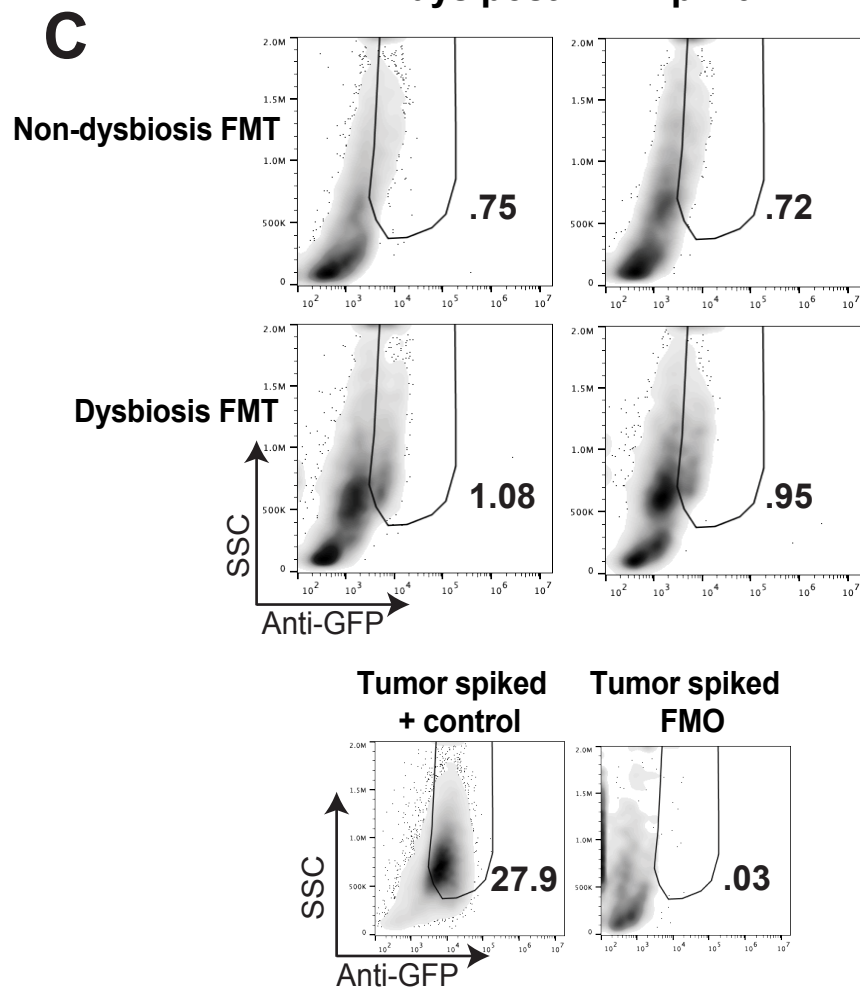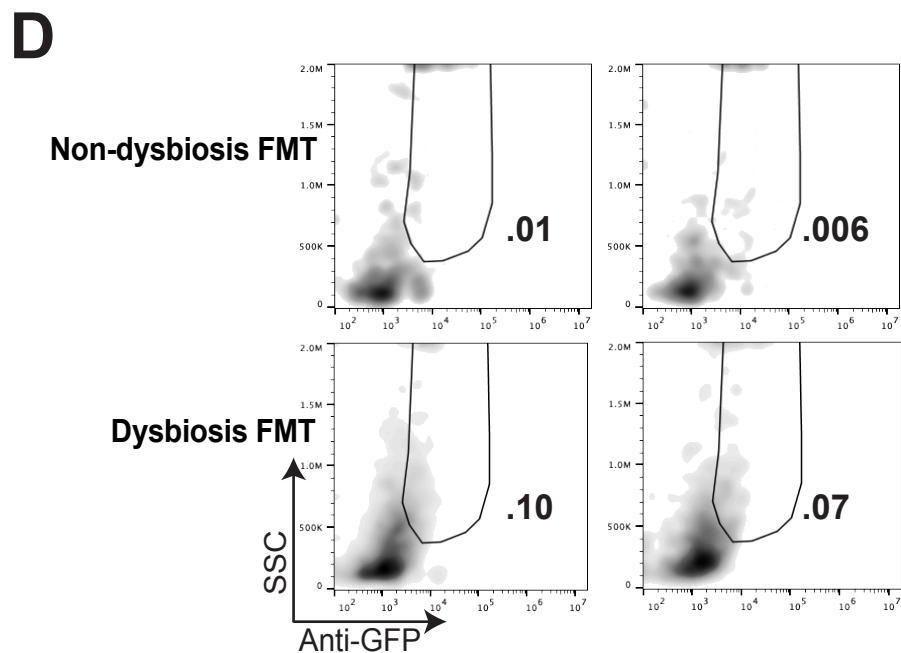

Supplement: NIHMS1529134-supplement-7.pdf [file NIHMS1529134-supplement-7.pdf]
